# Supplementary material for: Quercetin Inhibits Fibroblast Activation and Kidney Fibrosis Involving the Suppression of Mammalian Target of Rapamycin and β-catenin Signaling
Source: PubMed Central journal article supplement (PMC4823739; doi:10.1038/srep23968), 2016-04-07

Quercetin Inhibits Fibroblast Activation and Kidney Fibrosis Involving the  
Suppression of Mammalian Target of Rapamycin and  $\beta$ -catenin Signaling

Jiafa Ren<sup>1</sup>, Jianzhong Li<sup>1</sup>, Xin Liu<sup>1</sup>, Ye Feng<sup>1</sup>, Yuan Gui<sup>1</sup>, Junwei Yang<sup>1</sup>,  
Weichun He<sup>1</sup> and Chunsun Dai<sup>1,2¶</sup>

<sup>1</sup> Center for Kidney Disease, 2<sup>nd</sup> Affiliated Hospital, Nanjing Medical University,  
262 North Zhongshan Road, Nanjing, Jiangsu, China

<sup>2</sup> State Key Laboratory of Reproductive Medicine, Institute of Toxicology,  
Nanjing Medical University, Nanjing, Jiangsu, China

¶To whom correspondence should be addressed:

Chunsun Dai, MD/PhD, Center for Kidney Diseases, 2<sup>nd</sup> Affiliated Hospital,  
Nanjing Medical University, 262 North Zhongshan Road, Nanjing, Jiangsu, P.R.  
China. 210003 (86-25-52636077, E-mail: [daichunsun@njmu.edu.cn](mailto:daichunsun@njmu.edu.cn) to Dai C).

**Supplemental Figure 1: The general parameters of the mice at 2 weeks after UUO surgery w/o Quercetin treatment.** The mice were treated with vehicle or quercetin (25mg/kg.day, ip). At 2 weeks after UUO surgery, the blood from each mouse was harvested. The body weight and the biochemical parameters were examined. (A) Body weight, (B) Serum albumin level, (C) ALT; (D) AST; (E) TB, Total bilirubin; (F) DB, Direct bilirubin. ( $n=4$ ).

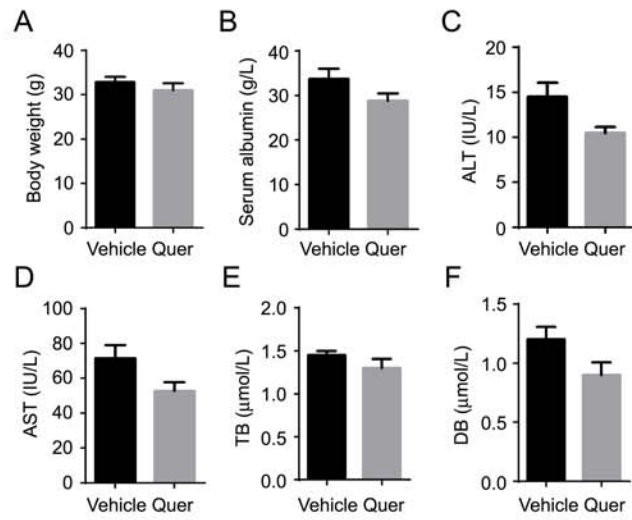

Supplement: srep23968-s1.pdf [file srep23968-s1.pdf]
